# Supplementary material for: The BioScope corpus: biomedical texts annotated for uncertainty, negation and their scopes
Source: PubMed Central journal article supplement (PMC2586758; doi:10.1186/1471-2105-9-s11-s9), 2008-11-19
Supplement: 1471-2105-9-S11-S9-S1.pdf [file 1471-2105-9-S11-S9-S1.pdf]

### Statistics of the top10 keyword candidates for each subcorpus

We present statistics (#annotated, #not annotated, keyword%, average scope size) for the 10 most common negation and speculative cue candidates for each subcorpus.

| <b>CLINICAL</b> |                |            |           |                           |
|-----------------|----------------|------------|-----------|---------------------------|
| NEGATION        | #non-annotated | #annotated | neg cue%  | avg scope length (tokens) |
| no              | 0              | 672        | 100%      | 4                         |
| without         | 0              | 97         | 100%      | 3                         |
| not             | 4              | 59         | 94%       | 5                         |
| negative        | 0              | 21         | 100%      | 0                         |
| lack            | 2              | 4          | 67%       | 6                         |
| can not         | 0              | 4          | 100%      | 4                         |
| none            | 1              | 2          | 67%       | 1                         |
| no longer       | 0              | 2          | 100%      | 2                         |
| absence         | 0              | 2          | 100%      | 3                         |
| rule - out      | 0              | 2          | 100%      | 2                         |
| SPECULATION     | #non-annotated | #annotated | spec cue% | avg scope length (tokens) |
| or              | 5              | 256        | 98%       | 4                         |
| evaluate for    | 0              | 144        | 100%      | 3                         |
| rule - out      | 0              | 130        | 100%      | 2                         |
| suggest         | 0              | 108        | 100%      | 5                         |
| may             | 0              | 107        | 100%      | 7                         |
| versus          | 0              | 102        | 100%      | 4                         |
| likely          | 0              | 67         | 100%      | 5                         |
| consistent with | 0              | 67         | 100%      | 5                         |
| appear          | 34             | 24         | 41%       | 5                         |
| possible        | 1              | 43         | 98%       | 4                         |

| <b>ARTICLES</b> |                |            |           |                           |
|-----------------|----------------|------------|-----------|---------------------------|
| NEGATION        | #non-annotated | #annotated | neg cue%  | avg scope length (tokens) |
| not             | 37             | 200        | 84%       | 7                         |
| no              | 10             | 49         | 83%       | 7                         |
| lack            | 0              | 38         | 100%      | 5                         |
| failed          | 2              | 26         | 93%       | 8                         |
| without         | 0              | 26         | 100%      | 5                         |
| can not         | 0              | 24         | 100%      | 10                        |
| exclude         | 14             | 2          | 13%       | 1                         |
| rather than     | 0              | 13         | 100%      | 8                         |
| absence         | 5              | 6          | 55%       | 5                         |
| none            | 1              | 10         | 91%       | 14                        |
| SPECULATION     | #non-annotated | #annotated | spec cue% | avg scope length (tokens) |
| predict         | 188            | 12         | 6%        | 15                        |
| or              | 124            | 18         | 13%       | 12                        |
| suggest         | 0              | 140        | 100%      | 13                        |
| can             | 109            | 20         | 16%       | 12                        |
| estimate        | 89             | 13         | 13%       | 13                        |
| indicate that   | 0              | 80         | 100%      | 15                        |

|                    |                       |                   |                  |                                  |
|--------------------|-----------------------|-------------------|------------------|----------------------------------|
| appear             | 13                    | 65                | 83%              | 16                               |
| if                 | 69                    | 3                 | 4%               | 13                               |
| may                | 1                     | 66                | 99%              | 11                               |
| prediction         | 63                    | 2                 | 3%               | 6                                |
| <b>ABSTRACTS</b>   |                       |                   |                  |                                  |
| <b>NEGATION</b>    | <b>#non-annotated</b> | <b>#annotated</b> | <b>neg cue%</b>  | <b>avg scope length (tokens)</b> |
| not                | 74                    | 1026              | 93%              | 7                                |
| no                 | 35                    | 205               | 85%              | 8                                |
| either             | 152                   | 2                 | 1%               | 3                                |
| failed             | 26                    | 106               | 80%              | 9                                |
| lack               | 0                     | 112               | 100%             | 6                                |
| absence            | 38                    | 57                | 60%              | 6                                |
| without            | 0                     | 83                | 100%             | 5                                |
| unable             | 0                     | 30                | 100%             | 10                               |
| can not            | 0                     | 30                | 100%             | 9                                |
| absent             | 12                    | 13                | 52%              | 7                                |
| <b>SPECULATION</b> | <b>#non-annotated</b> | <b>#annotated</b> | <b>spec cue%</b> | <b>avg scope length (tokens)</b> |
| suggest            | 4                     | 1226              | 100%             | 18                               |
| or                 | 937                   | 91                | 9%               | 7                                |
| may                | 1                     | 516               | 100%             | 12                               |
| indicate that      | 0                     | 509               | 100%             | 20                               |
| can                | 333                   | 44                | 12%              | 11                               |
| appear             | 41                    | 254               | 86%              | 17                               |
| could              | 87                    | 67                | 44%              | 12                               |
| potential          | 79                    | 47                | 37%              | 9                                |
| indicate           | 66                    | 46                | 41%              | 13                               |
| whether            | 1                     | 97                | 99%              | 15                               |
